# Supplementary material for: Levodopa Positively Affects Neovascular Age-Related Macular Degeneration
Source: PubMed Central journal article supplement — Am J Med. Author manuscript; Available in PMC 2022 Jan 1. (PMC7864558; doi:10.1016/j.amjmed.2020.05.038), 2020-07-03
Supplement: NIHMS1662434-supplement-1.pdf [file NIHMS1662434-supplement-1.pdf]

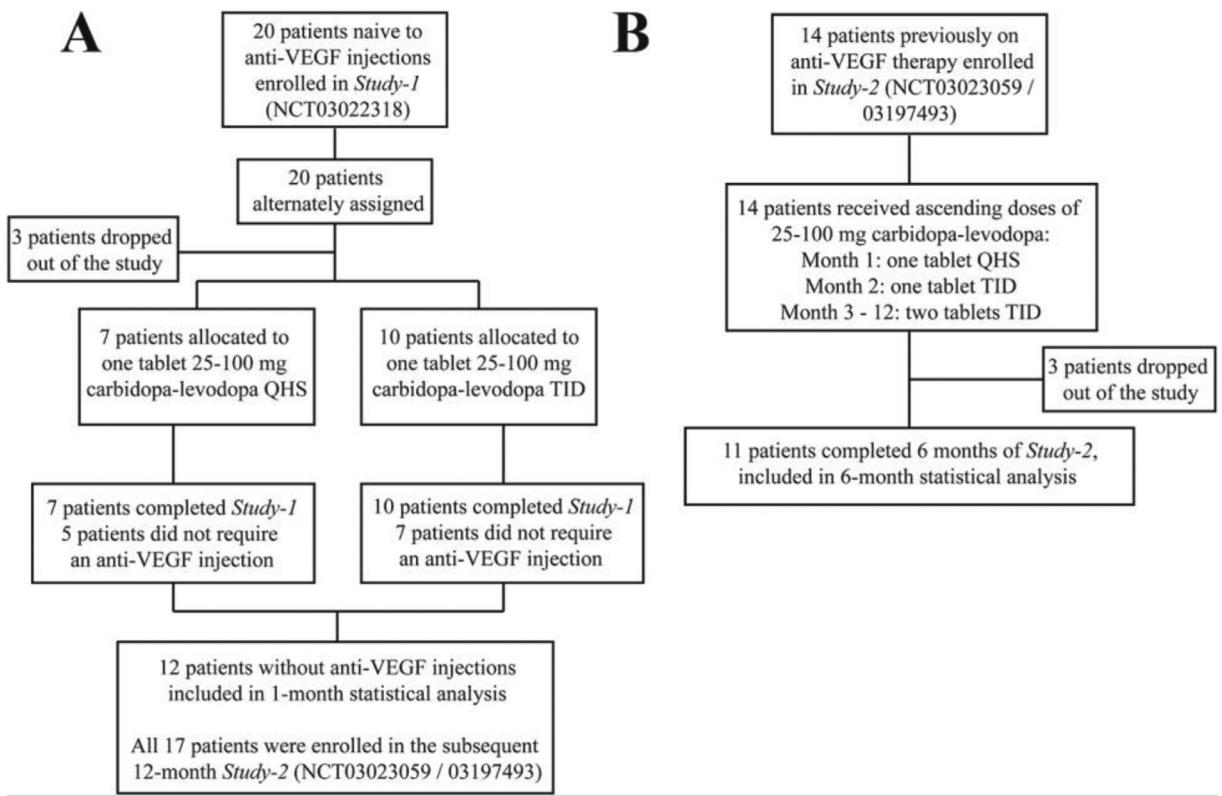

**Supplementary Figure** Clinical trial flowchart. These studies were proof-of-concept, Phase 2 trials that investigated the efficacy, safety, and tolerability of levodopa in patients with newly diagnosed neovascular age-related macular degeneration and naïve to anti-vascular endothelial growth factor (VEGF) therapy (A). Of the 20 patients enrolled, 3 patients discontinued the trial due to personal reasons, and 5 patients required anti-VEGF injections. The patients in Cohort 1 were evaluated for 1 month (Study-1) and enrolled subsequently in Study-2. Patients with neovascular age-related macular degeneration who had been receiving anti-VEGF therapy for at least 3 months (B) prior to Study-2 enrollment (Cohort 2) were evaluated for the same parameters. Of the 14 patients in Cohort 2, 3 discontinued the study due to reasons unrelated to the study drug.

**Supplementary Table 1** Baseline Characteristics of the Patients in Cohort 1 that Completed Study-1 and Completed 6 Months of the Subsequent Study-2

| Patient Number   | Sex    | Age, Years | Race  | AREDS Vitamins | No. of Letters as Measure of BCVA | Required anti-VEGF injection by Month-1 |
|------------------|--------|------------|-------|----------------|-----------------------------------|-----------------------------------------|
| 002-4 (001-1)    | Female | 78         | White | X              | 54                                |                                         |
| 002-6 (001-2)    | Male   | 79         | White |                | 51                                |                                         |
| 002-7 (001-3)    | Female | 63         | White | X              | 48                                |                                         |
| 002-8 (001-4)*   | Male   | 79         | White |                | 54                                |                                         |
| 002-12 (001-5)†  | Female | 87         | White | X              | 38                                |                                         |
| 002-14 (001-6)   | Male   | 80         | White | X              | 56                                |                                         |
| 002-16 (001-7)   | Female | 73         | White |                | 24                                | X                                       |
| 002-17 (001-8)   | Female | 75         | White | X              | 53                                |                                         |
| 002-18 (001-10)  | Female | 71         | White | X              | 42                                | X                                       |
| 002-19 (001-11)  | Male   | 58         | White |                | 54                                |                                         |
| 002-20 (001-12)  | Male   | 81         | White |                | 41                                |                                         |
| 002-21 (001-13)  | Male   | 77         | White | X              | 7                                 |                                         |
| 002-23 (001-14)  | Male   | 73         | White | X              | 43                                | X                                       |
| 002-27 (001-16)  | Female | 73         | White |                | 36                                |                                         |
| 002-28 (001-18)  | Female | 78         | White |                | 29                                |                                         |
| 002-30 (001-19)‡ | Female | 83         | White |                | 43                                | X                                       |
| 002-31 (001-20)  | Male   | 75         | White |                | 39                                | X                                       |

AREDS = Age-related Eye Disease Study; BCVA = best-corrected visual acuity, measured with the use of the Early Treatment Diabetic Retinopathy Study protocol at 7 m; a score of 40 letters is a Snellen equivalent of 20/40; VEGF = vascular endothelial growth factor.

Race was determined by the investigators. Two patients were excluded from statistical analysis

\*due to missing follow-up visits (month 4-9) or †due to intraocular lens displacement in the study eye. While the age for enrollment in these studies was 50-85 years; ‡1 patient was enrolled at the age of 87. The mean baseline age of Cohort 1 (75 years) was consistent with the general population's expected age of onset. X denotes patients taking these supplements.

**Supplementary Table 2** Baseline Characteristics of the Patients in Cohort 2.

| Patient Number | Sex    | Age, Years | Race  | AREDS Vitamins | No. of Letters as Measure of BCVA | Anti-VEGF injections/month Prior to Study-2 |
|----------------|--------|------------|-------|----------------|-----------------------------------|---------------------------------------------|
| 002-1          | Female | 67         | White |                | 34                                | 0.86                                        |
| 002-3          | Male   | 67         | White |                | 45                                | 0.69                                        |
| 002-5          | Female | 77         | White | X              | 47                                | 0.98                                        |
| 002-9          | Male   | 82         | White | X              | 23                                | 0.83                                        |
| 002-10         | Female | 74         | White |                | 29                                | 1.1                                         |
| 002-11         | Male   | 77         | White |                | 20                                | 0.58                                        |
| 002-13         | Female | 68         | White | X              | 37                                | 1.0                                         |
| 002-22         | Female | 70         | White |                | 34                                | 0.95                                        |
| 002-24         | Male   | 83         | White | X              | 44                                | 1.1                                         |
| 002-25         | Female | 85         | White | X              | 33                                | 0.87                                        |
| 002-29         | Female | 74         | White |                | 51                                | 0.59                                        |

AREDS = Age-Related Eye Disease Study; an X denotes patients taking these supplements; BCVA = best-corrected visual acuity, measured with the use of the Early Treatment Diabetic Retinopathy Study protocol at 7 m; a score of 40 letters is a Snellen equivalent of 20/40; VEGF = vascular endothelial growth factor.

Race was determined by the investigators. Rate of anti-VEGF injections prior to Study-2 enrollment was determined based on the patient's previous intra-vitreous injection frequency. The mean baseline age of Cohort 2 (75 years) was consistent with the general population's expected age of onset.

**Supplementary Table 3** Inclusion and Exclusion Criteria for Both Study-1 and Study-2

| Eligibility Criteria                                                                                                  |  |
|-----------------------------------------------------------------------------------------------------------------------|--|
| Inclusion criteria                                                                                                    |  |
| 50-85 years of age                                                                                                    |  |
| Willingness and ability to provide informed consent                                                                   |  |
| Clinical diagnosis of AMD with choroidal neovascularization in one eye                                                |  |
| Healthy or dry AMD of any grade in the fellow eye                                                                     |  |
| Maintain AREDS vitamin supplements or                                                                                 |  |
| Remain off AREDS vitamin supplements if not taking them prior                                                         |  |
| Exclusion criteria                                                                                                    |  |
| Use of other levodopa containing medication                                                                           |  |
| Use of dopamine receptor agonist medication                                                                           |  |
| Concurrent use of monoamine oxidase inhibitors                                                                        |  |
| Any other eye condition, disease, or history of trauma, which can impair vision (except cataract or cataract surgery) |  |
| Best-corrected visual acuity worse than 20/60                                                                         |  |
| Neovascular AMD in the fellow eye                                                                                     |  |
| Neurologic conditions which can impair vision                                                                         |  |
| Parkinson's disease                                                                                                   |  |
| Orthostatic hypertension or significant ECG abnormalities                                                             |  |
| Estimated glomerular filtration rate >20 mL/min                                                                       |  |
| Liver enzymes >3× upper limit of normal                                                                               |  |
| Hemoglobin A1C >9.0                                                                                                   |  |
| Additional significant lab abnormalities                                                                              |  |
| Women of childbearing potential                                                                                       |  |
| Known retinal hemorrhage                                                                                              |  |
| Not fluent in English                                                                                                 |  |

AMD = Age-related Macular Degeneration; AREDS = Age-Related Eye Disease Study; ECG = electrocardiogram

The age for enrollment in these studies was 50-85 years, one patient was enrolled at the age of 87. This participant had been recently diagnosed with neovascular AMD and was naïve to anti-vascular endothelial growth factor injections, which were scarce; due to these reasons we

**Supplementary Table 4** Adverse Events in Study-1 and Study-2

| Total Adverse Events at 6 Months                       | n |
|--------------------------------------------------------|---|
| Ocular SAEs caused by the study drug                   | 0 |
| Ocular SAEs not caused by the study drug               |   |
| Intraocular lens displacement                          | 1 |
| Systemic SAEs (nonocular) caused by the study drug     | 0 |
| Systemic SAEs (nonocular) not caused by the study drug |   |
| Pelvic fracture                                        | 1 |
| Partial knee replacement                               | 1 |
| Ovarian cancer recurrence                              | 1 |
| Ocular AEs                                             |   |
| Blurred vision                                         | 1 |
| Systemic AEs (nonocular)                               |   |
| Increased atrial fibrillation                          | 1 |
| Nausea                                                 | 2 |
| Abdominal pain                                         | 1 |
| Chest pain due to torn chest muscle*                   | 1 |
| Gas                                                    | 1 |
| Back spasms                                            | 1 |
| Restless legs                                          | 2 |
| Urinary tract infection                                | 2 |
| Pneumonia                                              | 1 |
| Sinus infection                                        | 1 |

AE = adverse event; SAE = serious adverse event.  
 \*One patient withdrew from the study due to the reported adverse event. If a patient had significant symptoms consistent with side effects associated with levodopa, the dose was reduced to 1 tablet 3 times a day (TID). Of the 28 patients on a regimen of 2 tablets TID, 5 patients tolerated only 1 tablet TID and 1 patient only tolerated 1 tablet at bedtime for the remainder of the study. All drug-related adverse events improved with dose reduction.  
 All data are n.
